# Supplementary material
Source: PubMed Central journal article supplement (PMC7526724)
Supplement: awaa203_supplementary_data.pdf [file awaa203_supplementary_data.pdf]

Supplementary Figure 1. Southern blotting of genomic DNA from 5 affected individuals from 2 families and 1 sporadic case. Patients show two discrete or overlapping bands of 8.9 to 13.7 kb. The sample from CI1 II:3 failed due to low DNA quality or quantity. In the control sample (CTRL), one 5-kb band corresponding to the expected size for reference allele (AAAAG)<sub>11</sub> is observed. Ladders used are DIG-labelled DNA Molecular Weight Marker II (Roche) (LADDER I, left) containing 8 fragments with the following base pair lengths: 125 (not shown), 564 (not shown), 2027, 2322, 4361, 6557, 9416, and 23,130 bp and DIG-labelled DNA Molecular Weight Marker III (Roche) (LADDER II, right) containing 13 fragments with the following base pair lengths: 125 (not shown), 564 (not shown), 831, 947, 1375, 1584, 1904, 2027, 3530, 4268, 4973, 5148, and 21,226 bp. N.I., sample not included in this study.

23kb-  
9.4kb-  
6.5kb-  
4.3kb-  
2.3kb-  
2.0kb-

-23kb  
-5.1/5.0kb  
-4.3kb  
-3.5kb  
-2.0/1.9kb  
-1.6kb  
-1.4kb  
-0.9kb  
-0.8kb

Ladder I  
M2 III:4  
C11 II:1  
M5 I:1  
C11 II:3  
M2 V:1  
Ladder II  
N.I.  
N.I.  
N.I.  
N.I.  
CTRL

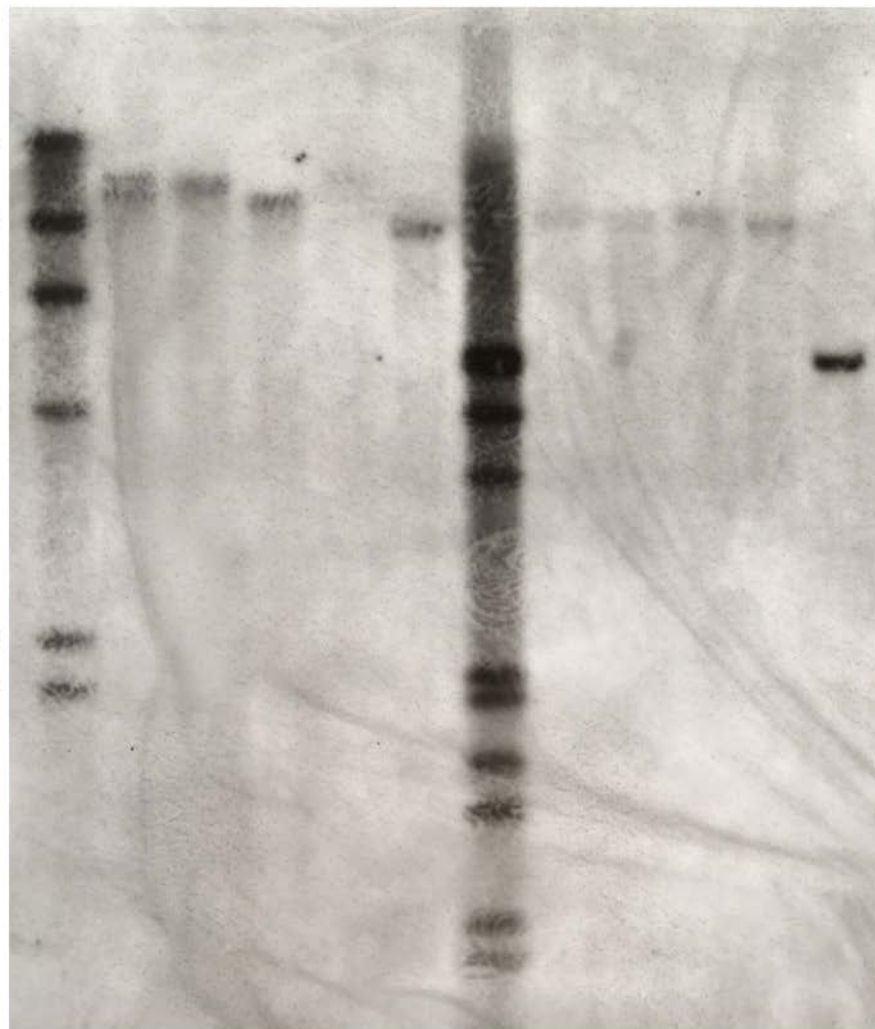

Supplementary Figure 2. MRI scans of individual M2 V:1. A. Age 6: Coronal T2 showing preservation of cerebellar mass but with abnormal signal in the superior deep cerebellar white matter which extended into the superior cerebellar peduncles. B. Age 15: Haste Coronal T2 scan showing mild generalised supratentorial and cerebellar volume loss but with particular prominence of the horizontal cerebellar fissure indicating crus 1 atrophy.

**A**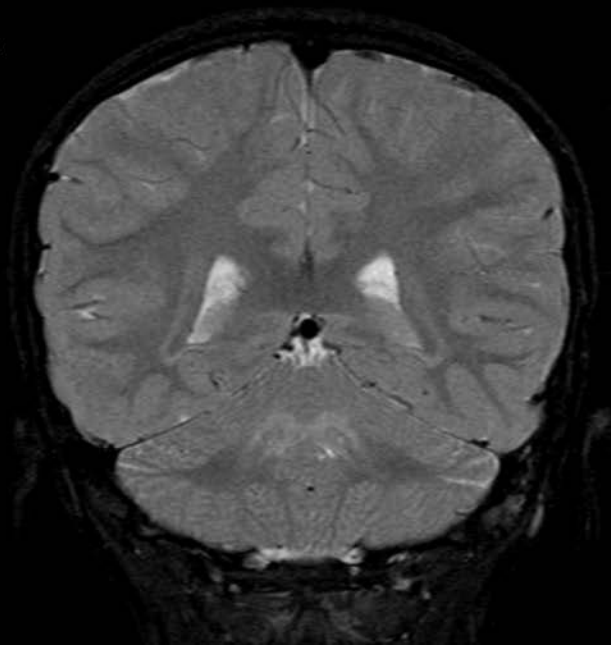**B**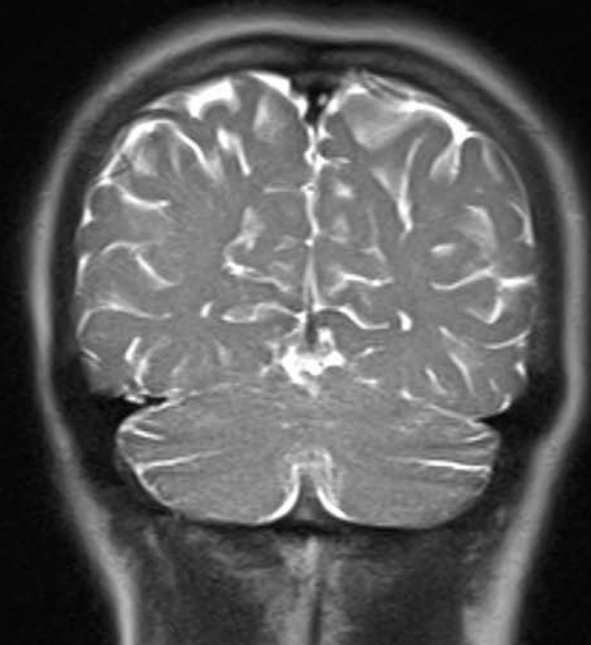

Supplementary Table 1. List of genes on the broad neurogenetic gene panel used for patient

M2 V:1.

| Genes on broad neurogenetic panel |
|-----------------------------------|
| AARS                              |
| ABCB7                             |
| ABCD1                             |
| ABHD12                            |
| ACTB                              |
| ACTG1                             |
| ADAR                              |
| ADCK3                             |
| ADGRG1                            |
| AFG3L2                            |
| AIFM1                             |
| AIMP1                             |
| AKT1                              |
| AKT3                              |
| ALDH18A1                          |
| ALDH3A2                           |
| ALS2                              |
| AMPD2                             |
| ANG                               |
| ANO10                             |
| ANO3                              |
| AP4B1                             |
| AP4E1                             |
| AP4M1                             |
| AP4S1                             |
| AP5Z1                             |
| APTX                              |
| ARFGEF2                           |
| ARHGEF10                          |
| ARL6IP1                           |
| ARSA                              |
| ARSI                              |
| ARX                               |
| ASAH1                             |
| ASCC1                             |
| ASPA                              |
| ASPM                              |
| ATCAY                             |
| ATL1                              |
| ATL3                              |
| ATM                               |
| ATP1A3                            |
| ATP2B3                            |

|          |
|----------|
| ATP2B4   |
| ATP6AP2  |
| ATP7A    |
| ATR      |
| B3GALNT2 |
| B4GALNT1 |
| BCAP31   |
| BEAN1    |
| BICD2    |
| BSCL2    |
| C12orf65 |
| C19orf12 |
| CACNA1A  |
| CACNA1B  |
| CACNA1G  |
| CACNB4   |
| CCT5     |
| CDK5RAP2 |
| CENPJ    |
| CEP152   |
| CHCHD10  |
| CHMP2B   |
| CLCN2    |
| CLPP     |
| COASY    |
| COL4A1   |
| COL4A2   |
| COX6A1   |
| CPT1C    |
| CSF1R    |
| CTDP1    |
| CUL3     |
| CWF19L1  |
| CYP2U1   |
| CYP7B1   |
| DARS2    |
| DCAF8    |
| DCTN1    |
| DCX      |
| DDHD1    |
| DDHD2    |
| DENR     |
| DHTKD1   |
| DNAJB2   |
| DNAJB5   |

|         |
|---------|
| DNM2    |
| DNMT1   |
| DRD2    |
| DRP2    |
| DST     |
| DYNC1H1 |
| EGR2    |
| EIF2B1  |
| EIF2B2  |
| EIF2B3  |
| EIF2B4  |
| EIF2B5  |
| ELOVL4  |
| ELOVL5  |
| ENTPD1  |
| EOMES   |
| ERLIN1  |
| ERLIN2  |
| EXOSC3  |
| EXOSC8  |
| FA2H    |
| FAM126A |
| FAM134B |
| FARS2   |
| FAT3    |
| FAT4    |
| FBLN5   |
| FBXO38  |
| FGD4    |
| FGF14   |
| FIG4    |
| FKRP    |
| FKTN    |
| FLNA    |
| FLRT1   |
| FLVCR1  |
| FTL     |
| FUS     |
| FXN     |
| GAD1    |
| GALC    |
| GAN     |
| GARS    |
| GBA2    |
| GCH1    |

|           |
|-----------|
| GDAP1     |
| GFAP      |
| GJB1      |
| GJB3      |
| GJC2      |
| GNAL      |
| GNB4      |
| GOSR2     |
| GRID2     |
| GRM1      |
| HACE1     |
| HARS      |
| HEPACAM   |
| HINT1     |
| HK1       |
| HNRNPA1   |
| HNRNPA2B1 |
| HNRNPUL1  |
| HNRNPUL2  |
| HOXD10    |
| HPCA      |
| HSPB1     |
| HSPB3     |
| HSPB8     |
| HSPD1     |
| IBA57     |
| IFIH1     |
| IGHMBP2   |
| IKBKAP    |
| INF2      |
| ISPD      |
| ITPR1     |
| KARS      |
| KCNA1     |
| KCNC3     |
| KCND3     |
| KCTD13    |
| KIAA0196  |
| KIF1A     |
| KIF1B     |
| KIF1C     |
| KIF21A    |
| KIF2A     |
| KIF5A     |
| KIF5C     |



|          |
|----------|
| KLC2     |
| KLC4     |
| KTN1     |
| L1CAM    |
| LARGE1   |
| LAS1L    |
| LITAF    |
| LMNA     |
| LMNB1    |
| LRSAM1   |
| LYST     |
| MAG      |
| MARS     |
| MARS2    |
| MATR3    |
| MCPH1    |
| MED25    |
| MFN2     |
| MLC1     |
| MORC2    |
| MPZ      |
| MRE11A   |
| MTMR2    |
| MTPAP    |
| MYH14    |
| MYH7     |
| NAGLU    |
| NDE1     |
| NDRG1    |
| NEFL     |
| NGF      |
| NIPA1    |
| NOP56    |
| NOTCH3   |
| NT5C2    |
| NTRK1    |
| OPA1     |
| OPTN     |
| OTUD4    |
| PAFAH1B1 |
| PANK2    |
| PARK2    |
| PAX6     |
| PCNT     |
| PDK3     |

|          |
|----------|
| PDYN     |
| PEX10    |
| PFN1     |
| PGAP1    |
| PIK3R5   |
| PLA2G6   |
| PLEKHG5  |
| PLP1     |
| PMP2     |
| PMP22    |
| PMPCA    |
| PNKP     |
| PNPLA6   |
| POLG     |
| POLR3A   |
| POLR3B   |
| POMGNT1  |
| POMGNT2  |
| POMK     |
| POMT1    |
| POMT2    |
| PPP2R2B  |
| PRDM12   |
| PRKCG    |
| PRKRA    |
| PRNP     |
| PRPH     |
| PRPS1    |
| PRRT2    |
| PRX      |
| PSAP     |
| PTEN     |
| RAB3GAP2 |
| RAB7A    |
| REEP1    |
| REEP2    |
| RELN     |
| RNASEH2B |
| RNASET2  |
| RNF170   |
| RNF216   |
| RPIA     |
| RTN2     |
| RTTN     |
| RUBCN    |

|          |
|----------|
| SACS     |
| SAMHD1   |
| SEPT9    |
| SBF1     |
| SBF2     |
| SCN11A   |
| SCN1A    |
| SCN9A    |
| SCYL1    |
| SETX     |
| SGCE     |
| SH3TC2   |
| SIGMAR1  |
| SIL1     |
| SLC12A6  |
| SLC16A2  |
| SLC17A5  |
| SLC1A3   |
| SLC20A2  |
| SLC25A46 |
| SLC2A1   |
| SLC33A1  |
| SLC52A1  |
| SLC52A2  |
| SLC52A3  |
| SLC5A7   |
| SLC6A3   |
| SLC9A1   |
| SNX14    |
| SOD1     |
| SOX10    |
| SPAST    |
| SPG11    |
| SPG20    |
| SPG21    |
| SPG7     |
| SPR      |
| SPTBN2   |
| SPTLC1   |
| SPTLC2   |
| SQSTM1   |
| STUB1    |
| SYNE1    |
| SYT14    |
| TAF1     |

|          |
|----------|
| TARDBP   |
| TBCD     |
| TBK1     |
| TBP      |
| TBR1     |
| TDP1     |
| TECPR2   |
| TFG      |
| TH       |
| THAP1    |
| TNFAIP1  |
| TOR1A    |
| TOR1AIP1 |
| TPP1     |
| TREX1    |
| TRIM2    |
| TRIP4    |
| TRPV4    |
| TSEN2    |
| TSEN34   |
| TSEN54   |
| TTBK2    |
| TTPA     |
| TTR      |
| TUBA1A   |
| TUBB     |
| TUBB2B   |
| TUBB3    |
| TUBB4A   |
| TUBG1    |
| UBA1     |
| UBA5     |
| UBQLN2   |
| UNC79    |
| UNC80    |
| USP8     |
| VAMP1    |
| VAPB     |
| VCP      |
| VLDLR    |
| VPS13A   |
| VPS37A   |
| VRK1     |
| WDR45    |
| WDR48    |

|         |
|---------|
| WDR62   |
| WNK1    |
| WWOX    |
| YARS    |
| YWHAE   |
| ZBTB18  |
| ZFR     |
| ZFYVE26 |
| ZFYVE27 |

Supplementary Table 2. Key clinical information for affected patients. d. Deceased; ↓: Decreased/reduced. ↑: Increased. AJ: Ankle jerks. Av: Average. BVL: Bilateral vestibular loss. CMAP: Compound muscle action potential. DBN: Downbeat nystagmus. Hor: Horizontal. LL: Lower limb. N: normal. N/A: not assessed. NCS: Nerve conduction studies. ND: not documented. Onset: age at symptom onset. SNAPs: Sensory nerve action potentials. TG: Tandem gait. UL: Upper limb. Vert: Vertical. vHIT: Video head impulse test. VVOR: Video visually enhanced vestibulo-ocular reflex. \*Patient assessed early in disease course due to having affected sibling known to Neurology service.

| Patient details     | Pertinent findings from first neurological examination |            |             |                                                                |                    |                                                 |                                           | Progression                              | Investigations                                                 |                                                                      |                                                  |
|---------------------|--------------------------------------------------------|------------|-------------|----------------------------------------------------------------|--------------------|-------------------------------------------------|-------------------------------------------|------------------------------------------|----------------------------------------------------------------|----------------------------------------------------------------------|--------------------------------------------------|
| Patient Sex Onset   | Gait                                                   | Dysarthria | Limb ataxia | Eye movements & head impulse                                   | Reflexes           | Sensation                                       | Other                                     | Years from onset to disability milestone | Brain MRI                                                      | NCS                                                                  | VHIT                                             |
| C1 II:1<br>F<br>48  | Ataxic                                                 | Mild       | Bilateral   | Saccadic breakdown of pursuit. Ocular dysmetria                | N                  | N                                               | Syncope                                   | Walker 5; Wheelchair 18                  | Brainstem & cerebellum atrophy 50 yrs                          | N/A                                                                  | BVL. Av gain R0.14, L0.15. 63 yrs                |
| C1 II:3<br>M<br>45  | Ataxic                                                 | Severe     | Bilateral   | Square wave jerks. Broken pursuit                              | Absent AJ          | N                                               | Dizziness, urinary urgency, chronic cough | Walker 10                                | Cerebellar vermian & hemispheric parenchymal atrophy 51 yrs    | ↓ SNAPs. Normal motor study                                          | BVL. Av gain R0.23, L0.33. 53 yrs                |
| M2 III:1<br>M<br>67 | Impaired TG                                            | N          | N           | N                                                              | Absent AJ          | ↓ foot pinprick                                 | Chronic cough                             | Independent                              | N/A                                                            | N/A                                                                  | N/A                                              |
| M2 III:2<br>F<br>49 | Ataxic                                                 | Severe     | UL & LL     | Nystagmus on hor. gaze to the right                            | ↓ AJ               | ND                                              | Syncope, urinary incontinence             | Walker 6; Wheelchair 9; Bedbound 11      | N/A                                                            | N/A                                                                  | N/A                                              |
| M2 III:3<br>M<br>57 | Impaired TG                                            | Moderate   | Mild UL     | N                                                              | ↓ UL & LL          | ↓ knee vibration sense                          | Foot pain, chronic cough                  | Walker 8                                 | Normal 63 yrs                                                  | ↓ SNAPs. Mildly ↓ LL motor conduction velocities.                    | BVL. Av gain R0.33, L0.31. Abnormal VVOR 64 yrs  |
| M2 III:4<br>F<br>46 | Impaired TG                                            | Mild       | N           | N                                                              | Absent AJ          | N                                               | Chronic cough                             | Stick 10; Walker 15                      | Normal 51 yrs, cerebellar atrophy 62 yrs                       | Absent SNAPs. ↓ CMAP amplitudes                                      | N/A                                              |
| M2 III:5<br>M<br>59 | ND                                                     | ND         | ND          | ND                                                             | ND                 | ND                                              | Hand/foot pain, chronic cough             | Independent                              | N/A                                                            | N/A                                                                  | Catch up saccades. Av gain R 0.67, L0.75. 58 yrs |
| M2 V:1<br>F<br>6    | Impaired TG                                            | Moderate   | Bilateral   | N                                                              | Upgoing plantars   | N                                               | Numb feet                                 | Wheelchair 2                             | Dorsal brainstem & cerebellar peduncle T2 hyperintensity 7 yrs | N/A                                                                  | BVL. Av gain R0.46, L.49. 18 yrs                 |
| M3 I:1<br>M<br>84   | Ataxic                                                 | Moderate   | Bilateral   | DBN on hor. gaze in both directions                            | ND                 | ↓ knee vibration sense, ↓ toe proprioception    | Numb feet, chronic cough                  | Walker < 1 yr                            | Cerebellar atrophy 84 yrs                                      | ↓ SNAPs. Normal motor study.                                         | BVL. Av gain R0.23, L0.28. 88 yrs                |
| M4 I:1<br>F<br>53   | Impaired TG                                            | N          | Mild UL     | DBN in primary position. Abnormal head impulse                 | N                  | ↓ pinprick & vibration below ankles             | Numbness, burning pain                    | Independent                              | Mild ventral vermian & Crus I atrophy 54 yrs                   | ↓ SNAPs. Normal motor study.                                         | BVL. Av gain R-0.04, L-0.03. 62 yrs              |
| M5 I:1<br>M<br>50   | Ataxic                                                 | Moderate   | N           | Rotatory & DBN in all directions. Occasional square wave jerks | ↓ UL               | ↓ vibration LL, ↓ left toe joint position sense | Burning pain in feet, chronic cough       | Walker 15                                | Moderate dorsal & severe ventral vermian atrophy 73 yrs        | Absent SNAPs ↓ CMAP amplitudes. Mildly ↓ motor conduction velocities | BVL. Av gain R0.06 L0.04. 77 yrs                 |
| M6 I:1<br>F<br>54   | Ataxic                                                 | Mild       | UL          | DBN on hor. gaze                                               | N                  | ↓ whole limb pinprick, ↓ big toe proprioception | Chronic cough                             | Walker 4                                 | Cerebellar & Crus I atrophy 56 yrs                             | ↓ SNAPs. Normal motor study                                          | BVL. Av gain R0.4, L0.51. Abnormal VVOR. 51 yrs  |
| M7 I:1<br>M<br>56   | Impaired TG                                            | Mild       | Bilateral   | DBN. Positive head impulse                                     | ↑ at triceps, ↓ AJ | ↓ whole limb vibration                          | Postural dizziness                        | Crutches 2; Walker 3                     | Mild ventral vermian & Crus I atrophy 56 yrs                   | Absent SNAPs. Normal motor study                                     | BVL. Av gain R0.22, L0.21. 60 yrs                |

| Marker ID  | Position      | Patient ID |         |          |        | Annotation                                       |
|------------|---------------|------------|---------|----------|--------|--------------------------------------------------|
|            |               | C1 II:1    | C1 II:3 | M2 III:4 | M2 V:1 |                                                  |
| rs6814900  | chr4:38157510 | 1/2        | 1/2     | 1/1      | 1/1    |                                                  |
| rs2011590  | chr4:38944101 | 1/1        | 1/1     | 1/1      | 1/1    | Cohort specific haplotype                        |
| rs7694333  | chr4:38952030 | 1/1        | 1/1     | 1/1      | 1/1    | Cohort specific haplotype                        |
| rs17583377 | chr4:38955135 | 1/1        | 1/1     | 1/1      | 1/1    | Cohort specific haplotype                        |
| rs6841592  | chr4:38965986 | 1/1        | 1/1     | 1/1      | 1/1    | Cohort specific haplotype                        |
| rs1864495  | chr4:39036311 | 1/1        | 1/1     | 1/1      | 1/1    | Cohort specific haplotype                        |
| rs2566120  | chr4:39055870 | 1/1        | 1/1     | 1/1      | 1/2    | Cohort specific haplotype                        |
| rs2566134  | chr4:39074295 | 2/2        | 2/2     | 2/2      | 2/2    | Same extended haplotype as Cortese <i>et al.</i> |
| rs3733275  | chr4:39122697 | 1/1        | 1/1     | 1/1      | 1/1    | Same extended haplotype as Cortese <i>et al.</i> |
| rs2044917  | chr4:39149491 | 1/1        | 1/1     | 1/1      | 1/1    | Same extended haplotype as Cortese <i>et al.</i> |
| rs2711991  | chr4:39151353 | 1/1        | 1/1     | 1/1      | 1/1    | Same extended haplotype as Cortese <i>et al.</i> |
| rs2062229  | chr4:39286766 | 2/2        | 2/2     | 2/2      | 2/2    | Same extended haplotype as Cortese <i>et al.</i> |
| rs2066790  | chr4:39318706 | 1/1        | 1/1     | 1/1      | 1/1    | Same core haplotype as Cortese <i>et al.</i>     |
| rs11096992 | chr4:39329102 | 2/2        | 2/2     | 2/2      | 2/2    | Same core haplotype as Cortese <i>et al.</i>     |
| rs17584703 | chr4:39364856 | 2/2        | 2/2     | 2/2      | 2/2    | Same core haplotype as Cortese <i>et al.</i>     |
| rs6844176  | chr4:39366590 | 1/1        | 1/1     | 1/1      | 1/1    | Same core haplotype as Cortese <i>et al.</i>     |
| rs6823497  | chr4:39385821 | 1/1        | 1/1     | 1/1      | 1/1    | Cohort specific haplotype                        |
| rs13135439 | chr4:39405151 | 2/2        | 2/2     | 2/2      | 2/2    | Cohort specific haplotype                        |
| rs11940694 | chr4:39414993 | 2/2        | 2/2     | 2/2      | 2/2    | Cohort specific haplotype                        |
| rs7674434  | chr4:39419409 | 1/1        | 1/1     | 1/1      | 1/1    | Cohort specific haplotype                        |
| rs13129975 | chr4:39526641 | 2/2        | 2/2     | 1/1      | 1/1    |                                                  |
| rs2381387  | chr4:39531928 | 2/2        | 2/2     | 2/2      | 2/2    |                                                  |
| rs10026108 | chr4:40379061 | 2/2        | 2/2     | 2/2      | 2/2    |                                                  |
| rs10008483 | chr4:40712481 | 2/2        | 2/2     | 2/2      | 2/2    |                                                  |

Supplementary Table 3. Comparison of core haplotype identified from Cortese *et al.* (2019) with patients from this cohort with WGS sequencing data. Marker SNPs are the same as Cortese *et al.* (2019). Our patients share the ‘core’ haplotype region identified in Cortese *et al.* (2019). Beyond that is an additional shared region that is specific to our cohort, suggesting a more recent common ancestor for our patients.



| Marker ID        | Position             | C1 II:1 | C1 II:3 | M2 III:4 | M2 V:1 | M3 I:1 | M4 I:1 | M5 I:1 | M6 I:1 | M7 I:1 |
|------------------|----------------------|---------|---------|----------|--------|--------|--------|--------|--------|--------|
| rs9995922        | chr4:36316348        | 1/2     | 1/2     | 1/1      | 1/1    | 1/1    | 1/1    | 1/1    | 1/2    | 1/1    |
| rs10049643       | chr4:36815755        | 1/1     | 1/1     | 1/1      | 1/1    | 1/1    | 1/1    | 1/1    | 1/1    | 1/1    |
| rs2973217        | chr4:37430794        | 1/1     | 1/1     | 1/1      | 1/1    | 1/2    | 1/1    | 1/2    | 1/2    | 1/2    |
| rs2276943        | chr4:37635128        | 1/2     | 1/2     | 2/2      | 2/2    | 2/2    | 2/2    | 1/2    | 2/2    | 1/1    |
| rs6531590        | chr4:37855485        | 1/1     | 1/1     | 1/1      | 1/1    | 0/0    | 0/0    | 0/0    | 0/0    | 0/0    |
| rs2279027        | chr4:37902135        | 1/1     | 1/1     | 1/1      | 1/1    | 1/1    | 1/1    | 1/2    | 1/2    | 1/2    |
| rs623945         | chr4:38118264        | 2/2     | 2/2     | 2/2      | 2/2    | 1/1    | 2/2    | 2/2    | 2/2    | 2/2    |
| rs2637706        | chr4:38510250        | 2/2     | 2/2     | 2/2      | 2/2    | 0/0    | 0/0    | 2/2    | 0/0    | 0/0    |
| rs17616226       | chr4:38689805        | 2/2     | 2/2     | 2/2      | 2/2    | 2/2    | 2/2    | 2/2    | 2/2    | 2/2    |
| rs5743810        | chr4:38828729        | 2/2     | 2/2     | 2/2      | 2/2    | 2/2    | 2/2    | 2/2    | 2/2    | 2/2    |
| rs2271031        | chr4:38935751        | 2/2     | 2/2     | 2/2      | 2/2    | 1/2    | 2/2    | 2/2    | 2/2    | 2/2    |
| <b>rs3733287</b> | <b>chr4:39215732</b> | 1/1     | 1/1     | 1/1      | 1/1    | 1/1    | 0/0    | 1/1    | 0/0    | 1/1    |
| rs4975020        | chr4:39527132        | 1/1     | 1/1     | 1/1      | 1/1    | 0/0    | 1/1    | 1/1    | 1/1    | 1/1    |
| rs7688174        | chr4:40243362        | 1/1     | 1/1     | 1/1      | 1/1    | 0/0    | 0/0    | 1/1    | 0/0    | 0/0    |
| rs10022491       | chr4:40335891        | 1/2     | 1/2     | 2/2      | 1/2    | 1/1    | 2/2    | 2/2    | 2/2    | 2/2    |
| rs278981         | chr4:40425993        | 1/1     | 1/1     | 1/1      | 1/1    | 1/2    | 1/1    | 1/1    | 1/1    | 1/1    |
| rs278950         | chr4:40502030        | 1/1     | 1/1     | 1/1      | 1/1    | 1/1    | 1/1    | 1/1    | 1/1    | 1/1    |
| rs4861066        | chr4:40808646        | 1/1     | 1/1     | 1/1      | 1/1    | 1/2    | 1/1    | 1/1    | 1/1    | 1/1    |
| rs10025369       | chr4:41014467        | 2/2     | 2/2     | 1/2      | 1/1    | 0/0    | 0/0    | 1/2    | 2/2    | 0/0    |
| rs17528160       | chr4:41263904        | 1/1     | 1/1     | 1/1      | 1/1    | 1/1    | 0/0    | 1/1    | 0/0    | 0/0    |
| rs4266323        | chr4:41524486        | 0/0     | 1/1     | 1/1      | 2/2    | 1/2    | 2/2    | 2/2    | 2/2    | 2/2    |
| rs17528897       | chr4:41661604        | 2/2     | 2/2     | 2/2      | 1/1    | 1/2    | 2/2    | 1/2    | 2/2    | 1/2    |
| rs12643893       | chr4:42067012        | 1/1     | 1/1     | 1/1      | 1/1    | 1/1    | 1/1    | 1/1    | 1/1    | 1/2    |
| rs898500         | chr4:42637169        | 1/1     | 1/1     | 1/2      | 1/1    | 1/2    | 1/1    | 1/1    | 1/1    | 1/2    |
| rs4861050        | chr4:43030595        | 1/1     | 1/1     | 1/1      | 1/1    | 1/1    | 1/1    | 1/1    | 0/0    | 1/1    |
| rs10022054       | chr4:43899131        | 1/2     | 1/2     | 1/1      | 1/1    | 1/1    | 1/1    | 1/2    | 0/0    | 1/1    |
| rs13117500       | chr4:44293822        | 2/2     | 2/2     | 2/2      | 1/2    | 2/2    | 2/2    | 2/2    | 2/2    | 2/2    |

Supplementary Table 4. Haplotyping summary across all patients with next-generation sequencing data. Highlighted regions are homozygous shared haplotypes.
